## Correction: Compliance with the enhanced recovery after surgery protocol and prognosis after colorectal cancer surgery: A prospective cohort study

Liang Li<sup>1,\*</sup>, Juying Jin<sup>1,\*</sup>, Su Min<sup>1</sup>, Dan Liu<sup>1</sup> and Ling Liu<sup>1</sup>

<sup>1</sup> Department of Anesthesiology, The First Affiliated Hospital of Chongqing Medical University, Chongqing, China

\* These authors have contributed equally to this work

**Published:** October 27, 2017

Copyright: Li et al. This is an open-access article distributed under the terms of the Creative Commons Attribution License 3.0 (CC BY 3.0), which permits unrestricted use, distribution, and reproduction in any medium, provided the original author and source are credited.

**This article has been corrected:** the funding information statement was updated and is as follows:

### FUNDING

This work was supported by grant of the Municipal Medical Key Discipline of Chongqing (YuWeiKeJiao No. 2007-2), and by grant of Integrated Demonstration Project of Chongqing Science and Technology Commission (cstc2015jcsf10008-1).

Original article: Oncotarget. 2017; 8:53531-53541. <https://doi.org/10.18632/oncotarget.18602>
